# Supplementary material for: Spirocitrinols A and B, citrinin derivatives with a spiro[chromane-2,3′-isochromane] skeleton from Penicillium citrinum
Source: Royal Society of Chemistry journal article supplement (doi:10.1039/d3ra00665d), 2023-01-01

## Supplementary Information

# Spirocitrinols A and B, Citrinin Derivatives with a Spiro[chromane-2,3'-isochromane] Skeleton from *Penicillium citrinum*

Junjie Tong,<sup>†ab</sup> Yang Zhang,<sup>†c</sup> Yang Xu,<sup>d</sup> Yangyang Han,<sup>d</sup> Chuan Li,<sup>\*b</sup> Wenying  
Zhuang,<sup>d</sup> and Yongsheng Che<sup>\*ab</sup>

### Affiliation

<sup>a</sup> Tianjin University of Traditional Chinese Medicine, Tianjin 300193, People's Republic of China

<sup>b</sup> NHC Key Laboratory of Biotechnology of Antibiotics, Institute of Medicinal Biotechnology, Chinese Academy of Medical Sciences & Peking Union Medical College, Beijing 100050, People's Republic of China

<sup>c</sup> State Key Laboratory of Toxicology & Medical Countermeasures, Beijing Institute of Pharmacology & Toxicology, Beijing 100850, People's Republic of China

<sup>d</sup> State Key Laboratory of Mycology, Institute of Microbiology, Chinese Academy of Sciences, Beijing 100101, People's Republic of China

### Correspondence

\* To whom correspondence should be addressed.

Yongsheng Che. E-mail: [ysche@imb.cams.cn](mailto:ysche@imb.cams.cn);

Chuan Li. E-mail: [lichuan@imb.cams.cn](mailto:lichuan@imb.cams.cn).

| <b>Contents</b>                                                                                                          | <b>Page</b> |
|--------------------------------------------------------------------------------------------------------------------------|-------------|
| 1) <b>Table S1.</b> NMR data for <b>1</b> in methanol- <i>d</i> <sub>4</sub>                                             | 3           |
| 2) <b>Figure S1.</b> <sup>1</sup> H NMR spectrum of spirocitrinol A ( <b>1</b> ; 600 MHz, DMSO- <i>d</i> <sub>6</sub> )  | 4           |
| 3) <b>Figure S2.</b> <sup>13</sup> C NMR spectrum of spirocitrinol A ( <b>1</b> ; 150 MHz, DMSO- <i>d</i> <sub>6</sub> ) | 5           |
| 4) <b>Figure S3.</b> HSQC spectrum of spirocitrinol A ( <b>1</b> ; 600 MHz, DMSO- <i>d</i> <sub>6</sub> )                | 6           |
| 5) <b>Figure S4.</b> HMBC spectrum of spirocitrinol A ( <b>1</b> ; 600 MHz, DMSO- <i>d</i> <sub>6</sub> )                | 7           |
| 6) <b>Figure S5.</b> NOESY spectrum of spirocitrinol A ( <b>1</b> ; 600 MHz, DMSO- <i>d</i> <sub>6</sub> )               | 8           |
| 7) <b>Figure S6.</b> HRESIMS spectrum of spirocitrinol A ( <b>1</b> )                                                    | 9           |
| 8) <b>Figure S7.</b> <sup>1</sup> H NMR spectrum of spirocitrinol B ( <b>2</b> ; 600 MHz, DMSO- <i>d</i> <sub>6</sub> )  | 10          |
| 9) <b>Figure S8.</b> <sup>13</sup> C NMR spectrum of spirocitrinol B ( <b>2</b> ; 150 MHz, DMSO- <i>d</i> <sub>6</sub> ) | 11          |
| 10) <b>Figure S9.</b> HSQC spectrum of spirocitrinol B ( <b>2</b> ; 600 MHz, DMSO- <i>d</i> <sub>6</sub> )               | 12          |
| 11) <b>Figure S10.</b> HMBC spectrum of spirocitrinol B ( <b>2</b> ; 600 MHz, DMSO- <i>d</i> <sub>6</sub> )              | 13          |
| 12) <b>Figure S11.</b> NOESY spectrum of spirocitrinol B ( <b>2</b> ; 600 MHz, DMSO- <i>d</i> <sub>6</sub> )             | 14          |
| 13) <b>Figure S12.</b> NOE difference spectrum of spirocitrinol B ( <b>2</b> ; 600 MHz, DMSO- <i>d</i> <sub>6</sub> )    | 15          |
| 14) <b>Figure S13.</b> HRESIMS spectrum of spirocitrinol B ( <b>2</b> )                                                  | 16          |
| 15) <b>Figure S14.</b> The optimized conformers of <b>1a</b>                                                             | 17          |
| 16) <b>Figure S15.</b> The optimized conformers of <b>2a</b>                                                             | 18          |
| 17) <b>Figure S16.</b> The ITS rDNA sequence data of <i>Penicillium citrinum</i>                                         | 19          |
| 18) <b>Figure S17.</b> Cytotoxic effects of compounds <b>1</b> and <b>2</b> against seven tumor cell<br>lines            | 19          |
| 19) <b>Scheme S1.</b> Plausible biosynthetic pathways for compounds <b>1</b> and <b>2</b>                                | 20          |

**Table S1. NMR Data for **1** in Methanol-*d*<sub>4</sub>**

| no  | <b>1</b>              |                                |                    |
|-----|-----------------------|--------------------------------|--------------------|
|     | $\delta_C^a$ , mult.  | $\delta_H^b$ ( <i>J</i> in Hz) | HMBC               |
| 1   | 137.3, qC             |                                |                    |
| 2   | 116.0, qC             |                                |                    |
| 3   | 156.6, qC             |                                |                    |
| 4   | 100.9, CH             | 6.01, s                        | 2, 3, 5, 6         |
| 5   | 150.8, qC             |                                |                    |
| 6   | 111.6, qC             |                                |                    |
| 7   | 61.1, CH              | 4.99, dd (4.6, 12.0)           | 10                 |
| 8   | 76.6, CH              | 4.13, m                        | 7, 9               |
| 9   | 36.2, CH              | 2.73, m                        | 1, 8               |
| 10a | 37.0, CH <sub>2</sub> | 2.44, dd (4.8, 12.0)           | 6, 7, 21           |
| 10b |                       | 1.75, t (12.0)                 | 6, 7, 21           |
| 11  | 18.8, CH <sub>3</sub> | 1.41, d (6.6)                  | 8, 9               |
| 12  | 22.8, CH <sub>3</sub> | 1.23, d (7.2)                  | 1, 8, 9            |
| 13  | 10.4, CH <sub>3</sub> | 2.05, s                        | 1, 2               |
| 14  | 135.0, qC             |                                |                    |
| 15  | 115.4, qC             |                                |                    |
| 16  | 153.3, qC             |                                |                    |
| 17  | 111.9, qC             |                                |                    |
| 18  | 149.3, qC             |                                |                    |
| 19  | 113.6, qC             |                                |                    |
| 20a | 62.0, CH <sub>2</sub> | 4.65, d (14.4)                 | 14, 19             |
| 20b |                       | 4.82, d (15.0)                 | 14, 19, 21         |
| 21  | 102.4, qC             |                                |                    |
| 22  | 39.6, CH              | 2.92, m                        | 10, 14, 19, 21, 23 |
| 23  | 18.7, CH <sub>3</sub> | 1.18, d (6.6)                  |                    |
| 24  | 10.8, CH <sub>3</sub> | 2.13, s                        | 14, 15, 16         |
| 25  | 9.2, CH <sub>3</sub>  | 2.15, s                        | 17, 18             |

<sup>a</sup> Recorded at 150 MHz. <sup>b</sup> Recorded at 600 MHz

**Figure S1.**  $^1\text{H}$  NMR Spectrum of Spirocitrinol A (**1**; 600 MHz,  $\text{DMSO-}d_6$ )

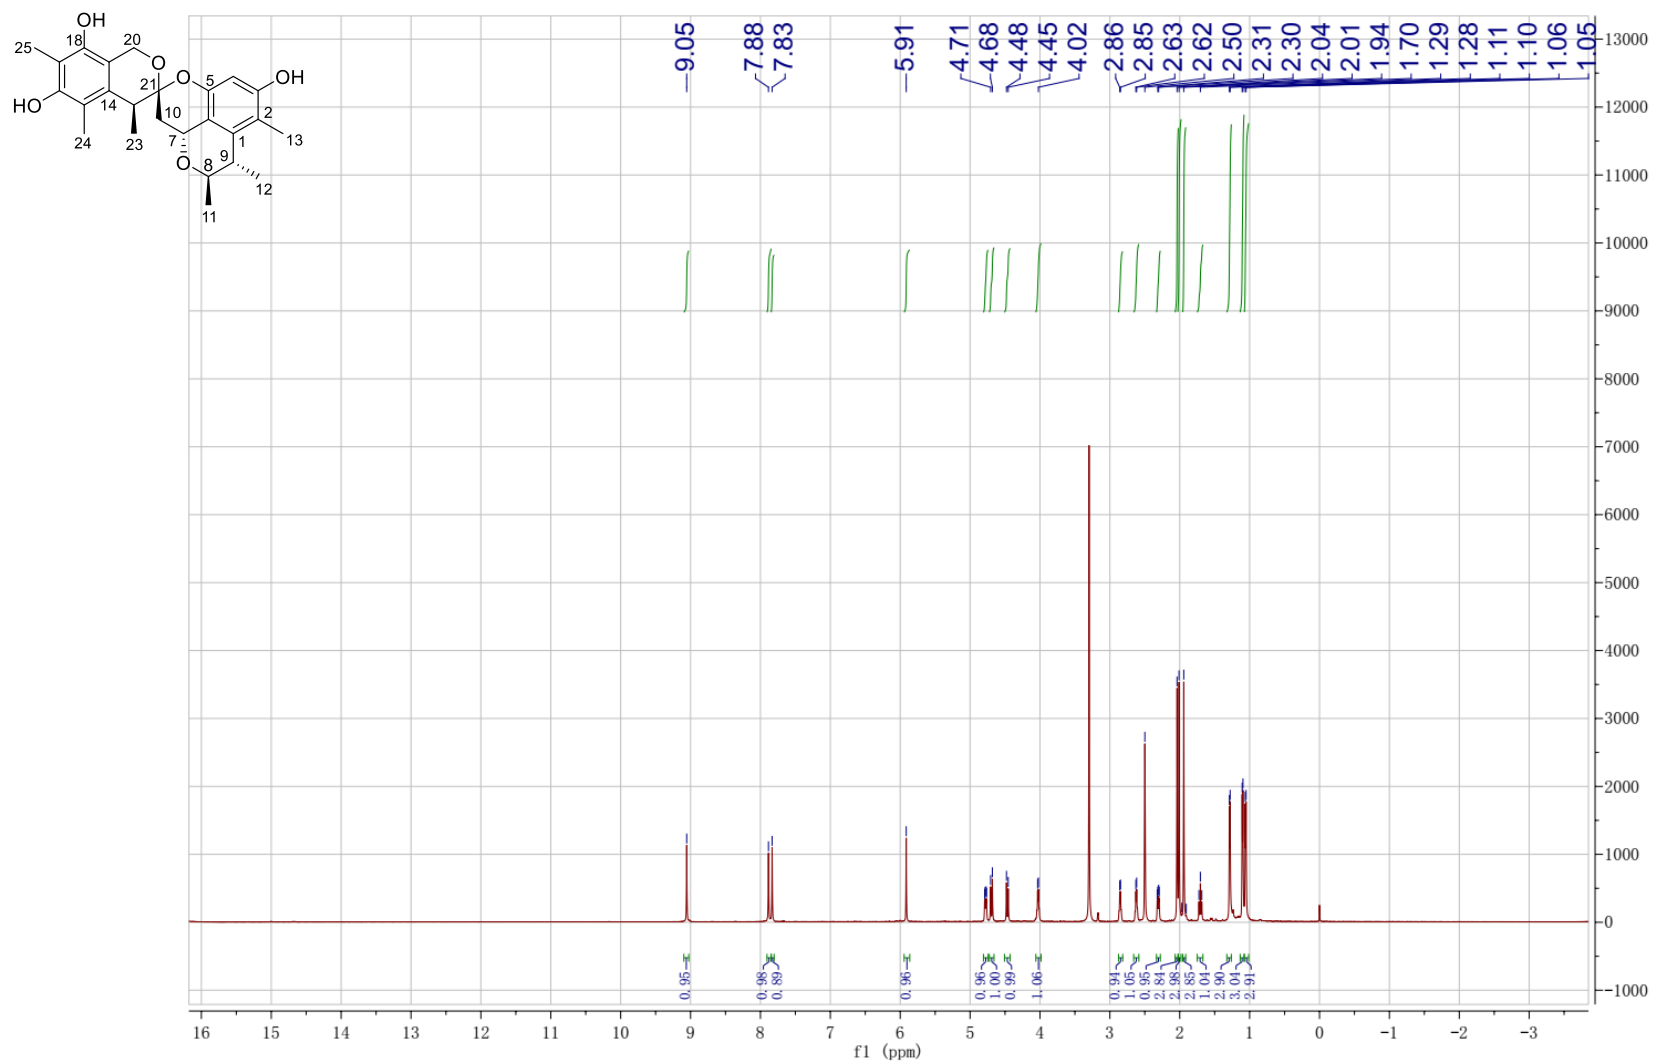

**Figure S2.**  $^{13}\text{C}$  NMR Spectrum of Spirocitrinol A (**1**; 150 MHz,  $\text{DMSO-}d_6$ )

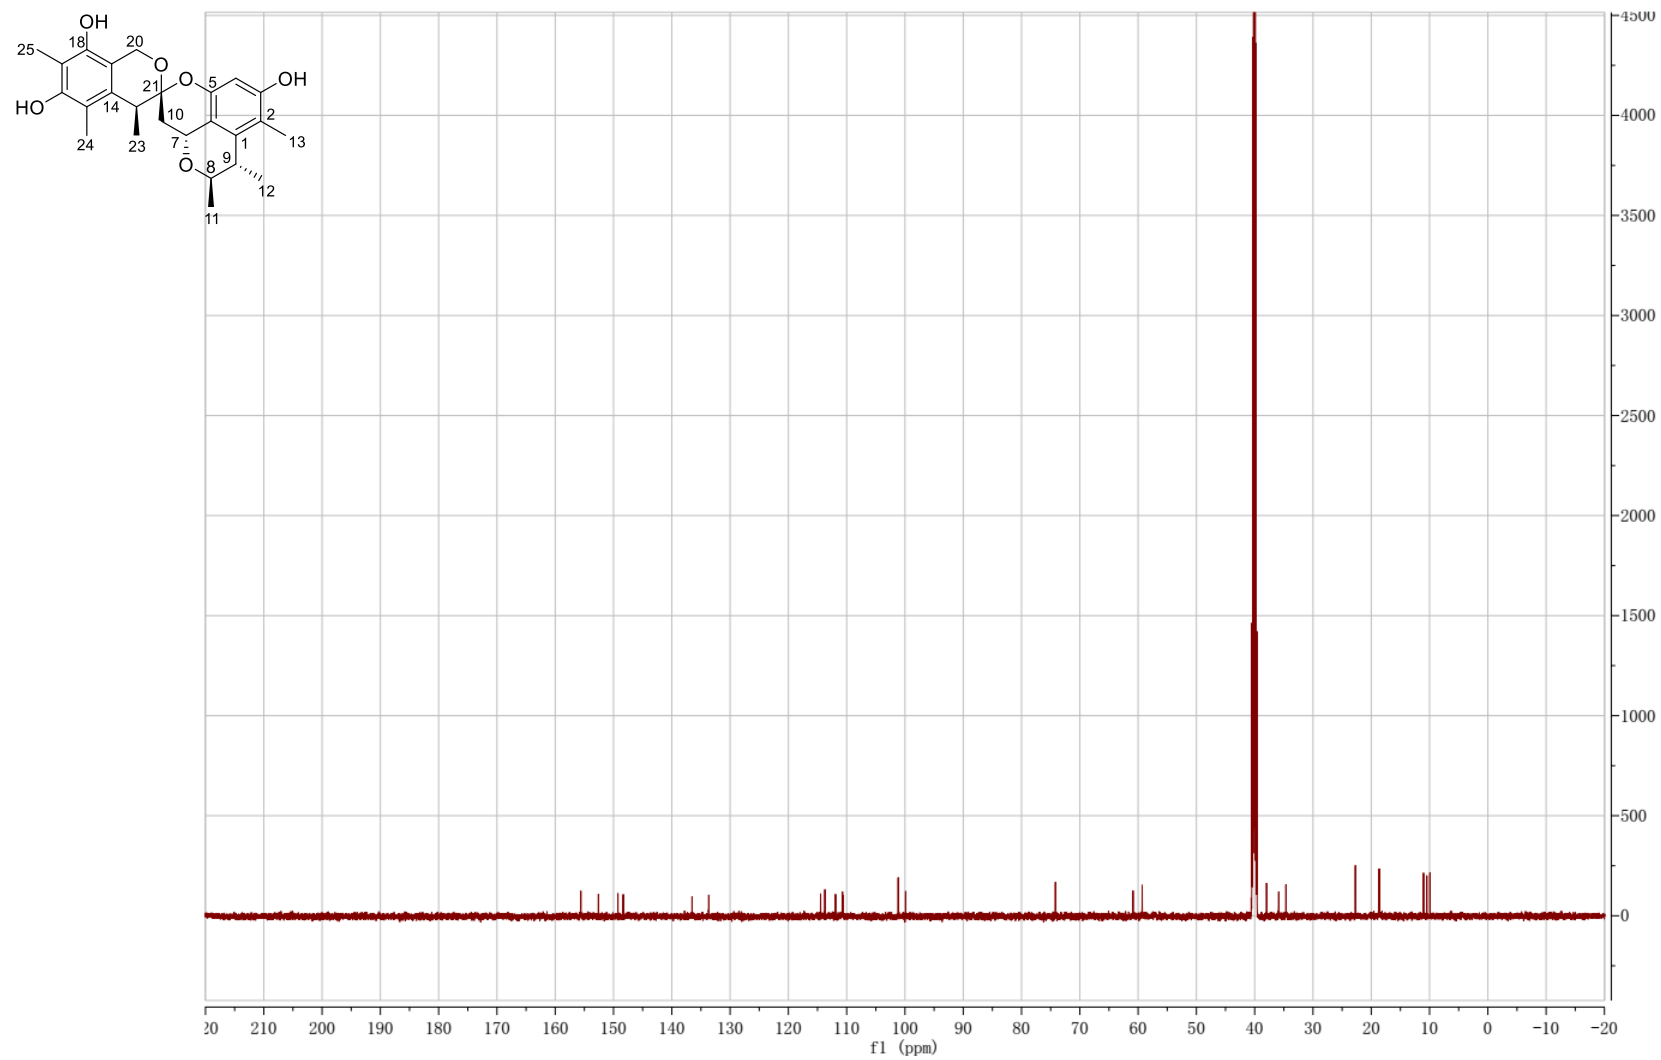

**Figure S3.** HSQC Spectrum of Spirocitrinol A (**1**; 600 MHz, DMSO-*d*<sub>6</sub>)

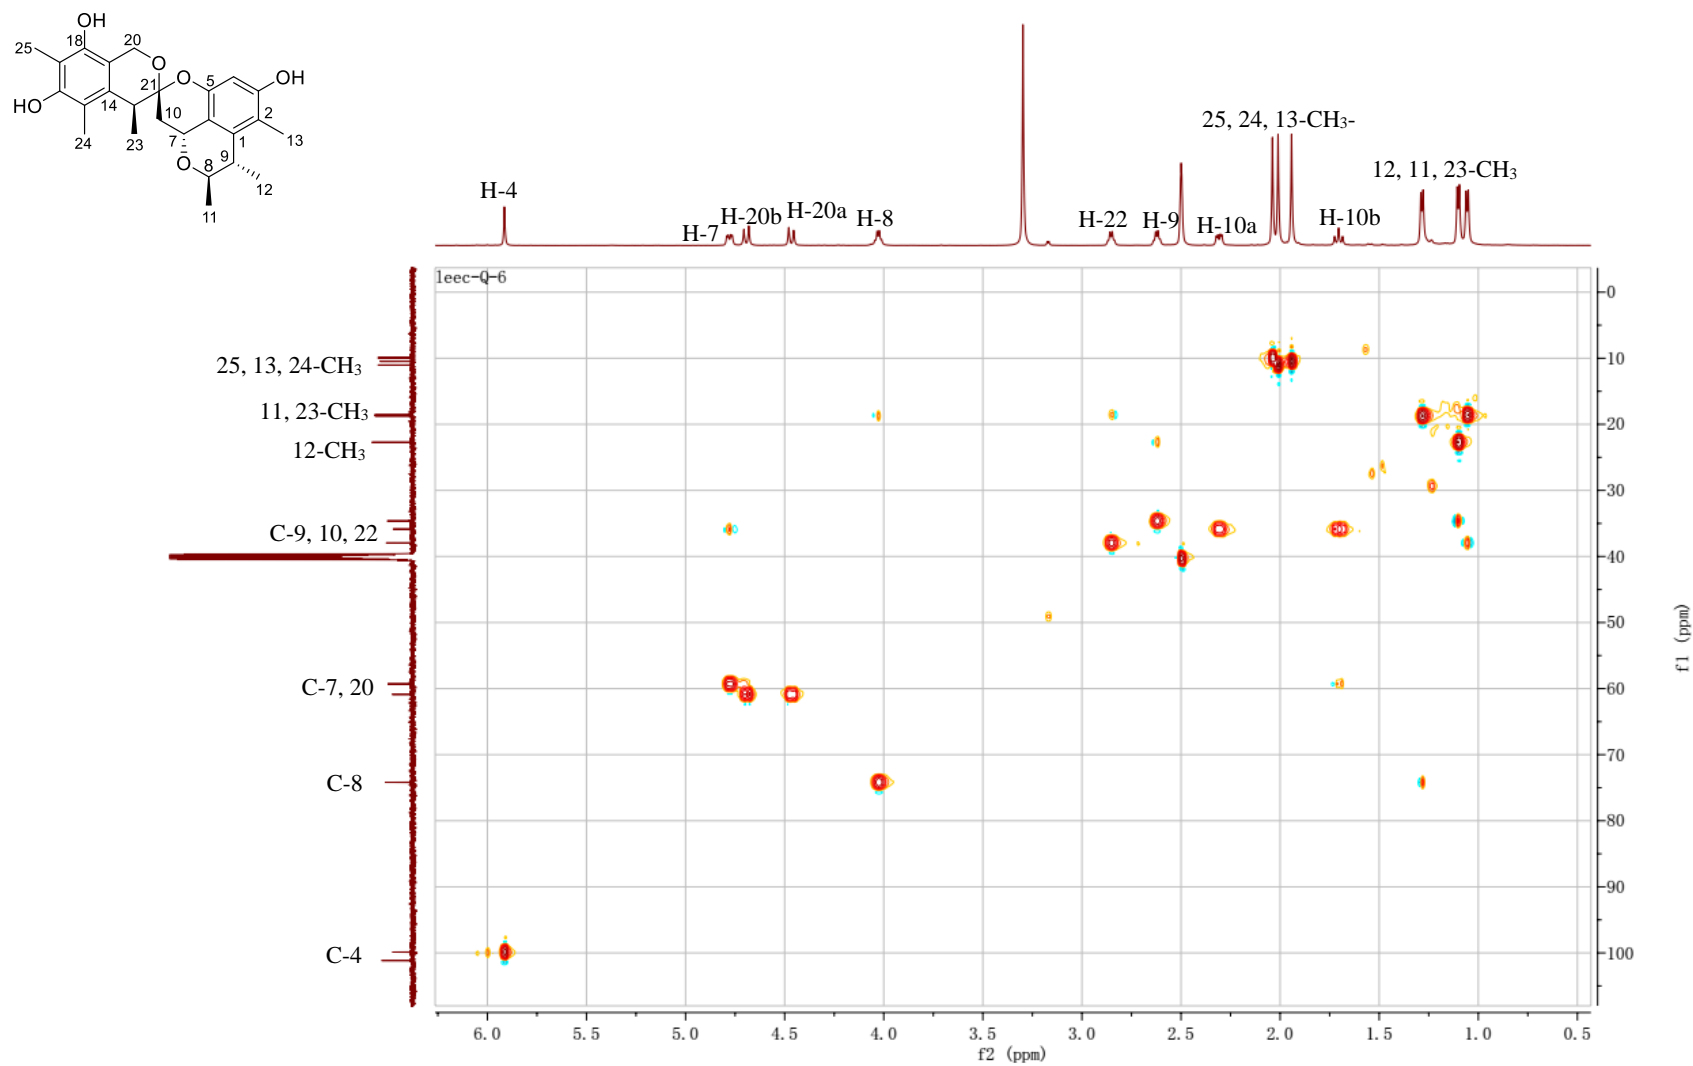

**Figure S4.** HMBC Spectrum of Spirocitrinol A (1; 600 MHz, DMSO-*d*<sub>6</sub>)

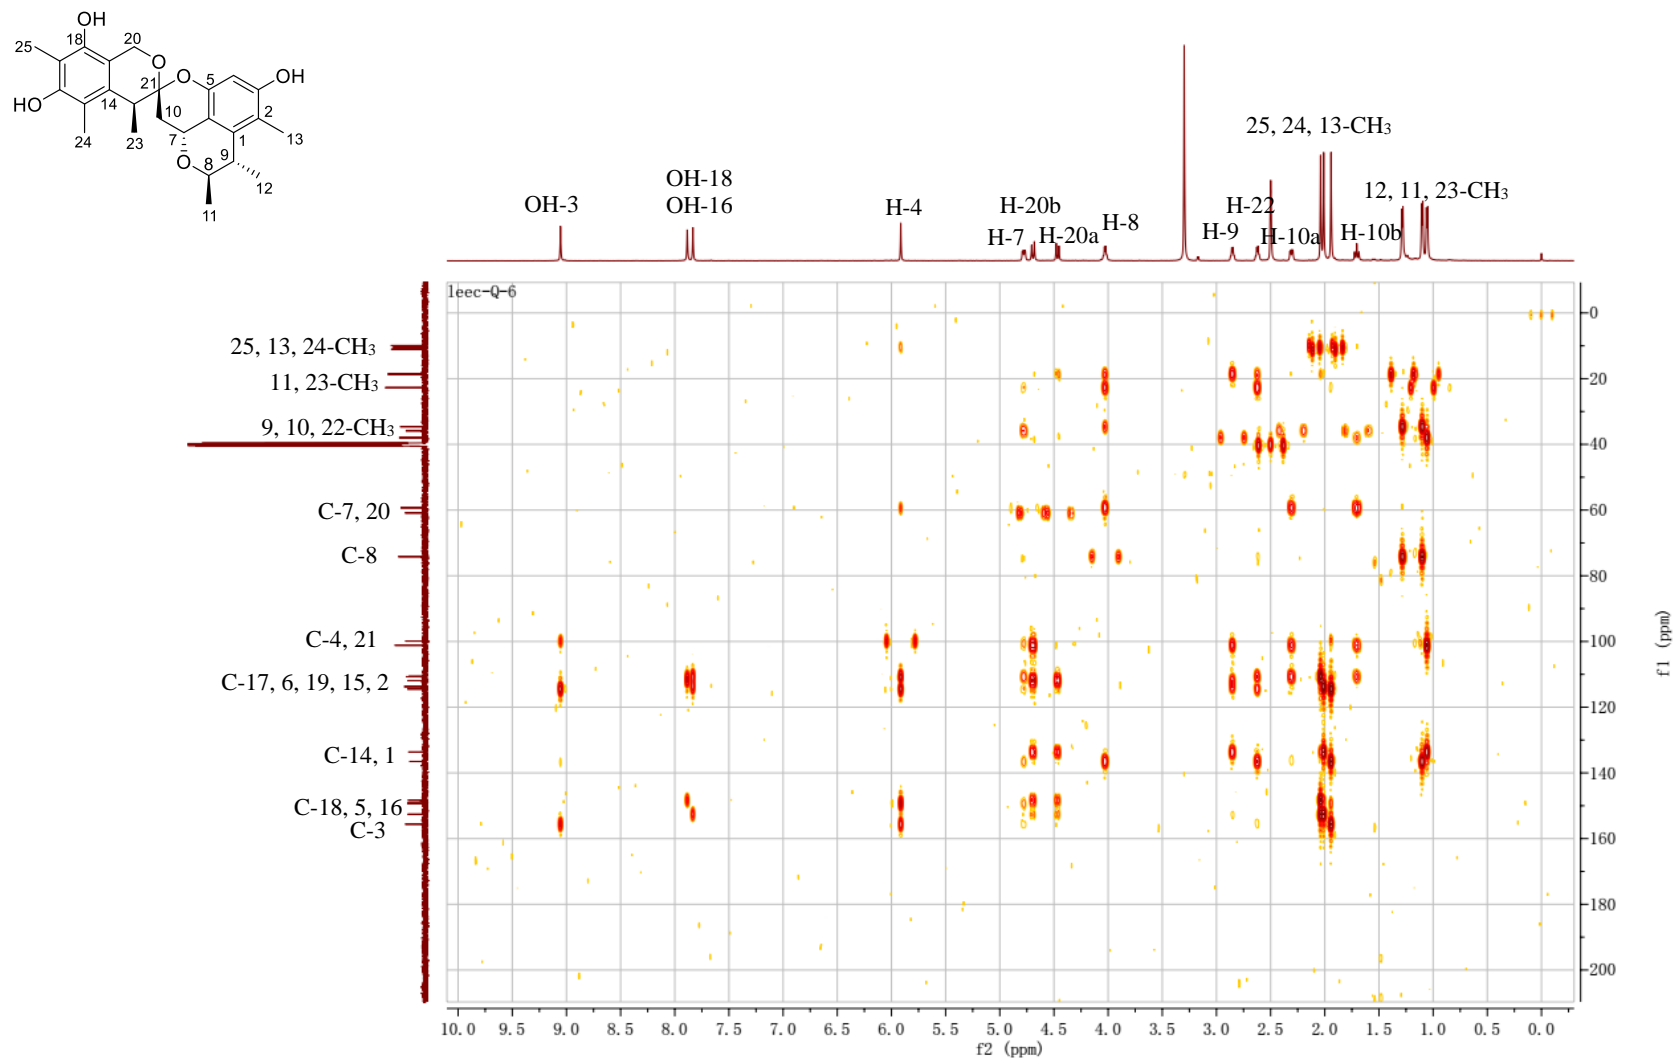

**Figure S5.** NOESY Spectrum of Spirocitrinol A (**1**; 600 MHz, DMSO-*d*<sub>6</sub>)

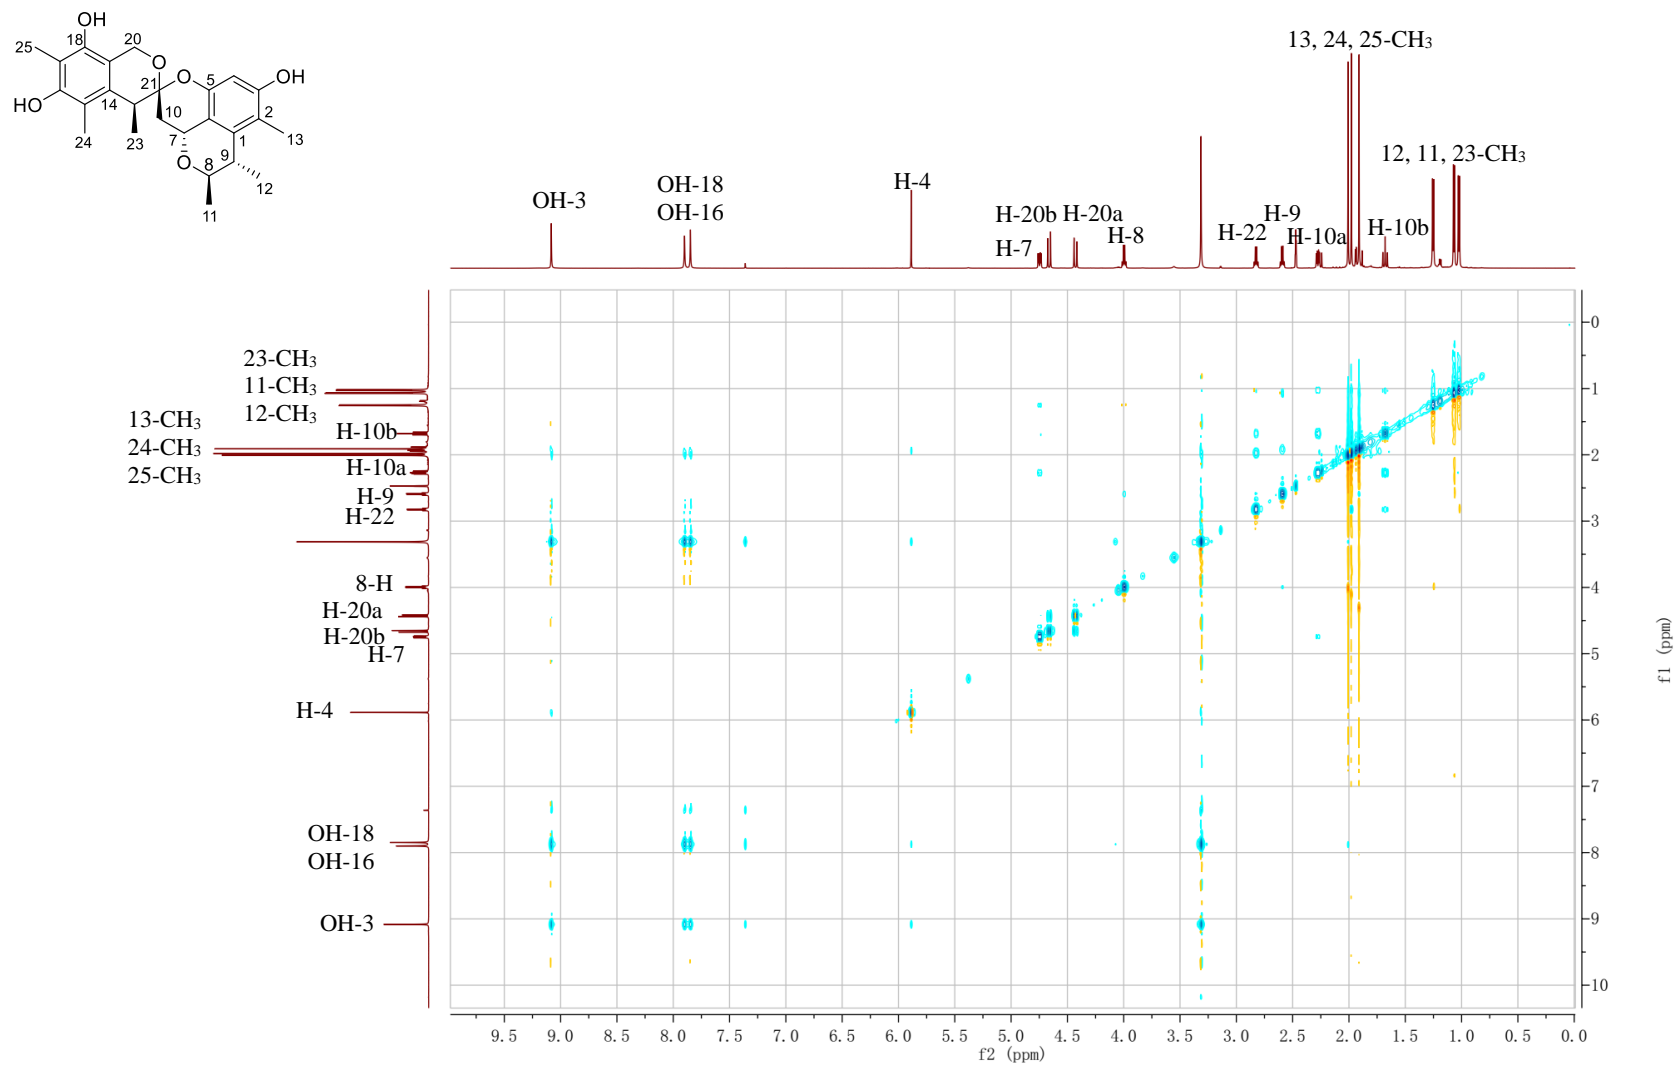



**Figure S6.** HRESIMS Spectrum of Spirocitrinol A (1)

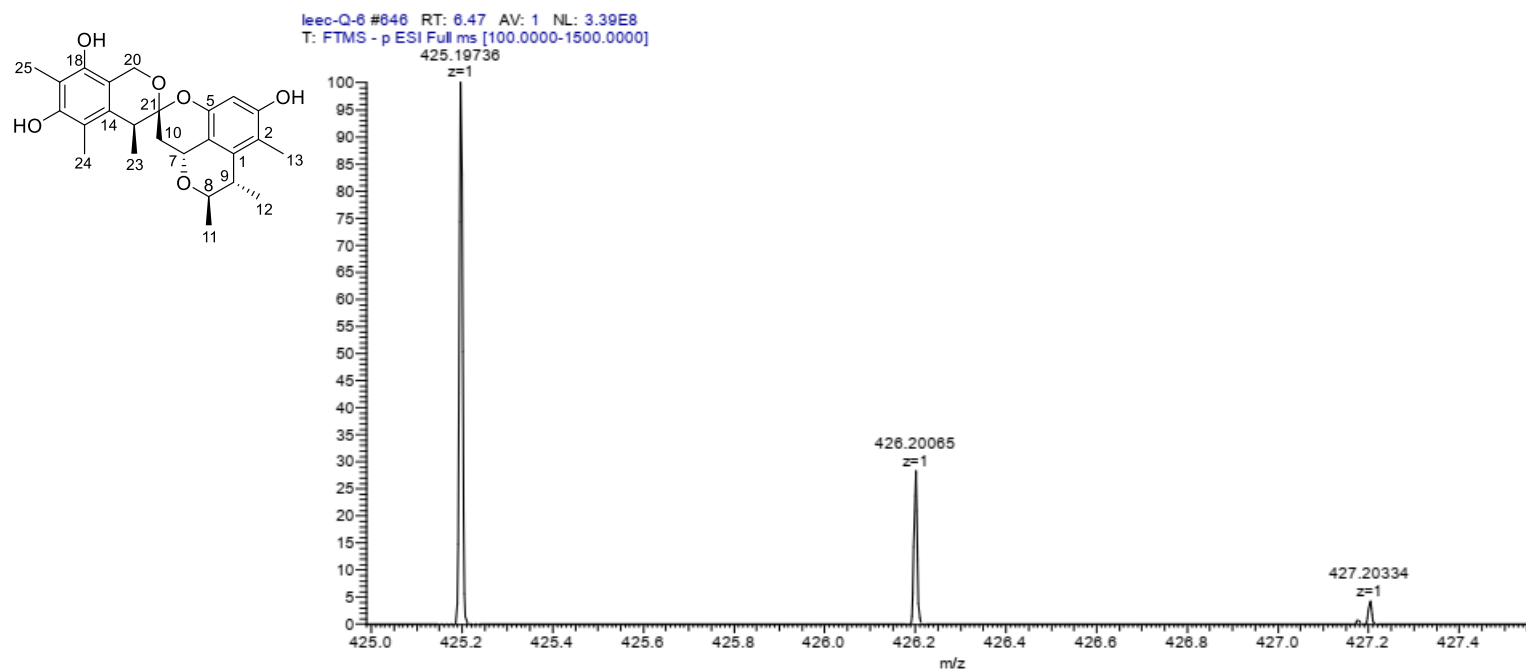

| m/z       | Theo. Mass | Delta (ppm) | RDB equiv. | Composition |     |
|-----------|------------|-------------|------------|-------------|-----|
| 425.19736 | 425.19696  | 0.94        | 11.5       | C25 H29 O6  | M-H |

**Figure S7.**  $^1\text{H}$  NMR Spectrum of Spirocitrinol B (**2**; 600 MHz,  $\text{DMSO-}d_6$ )

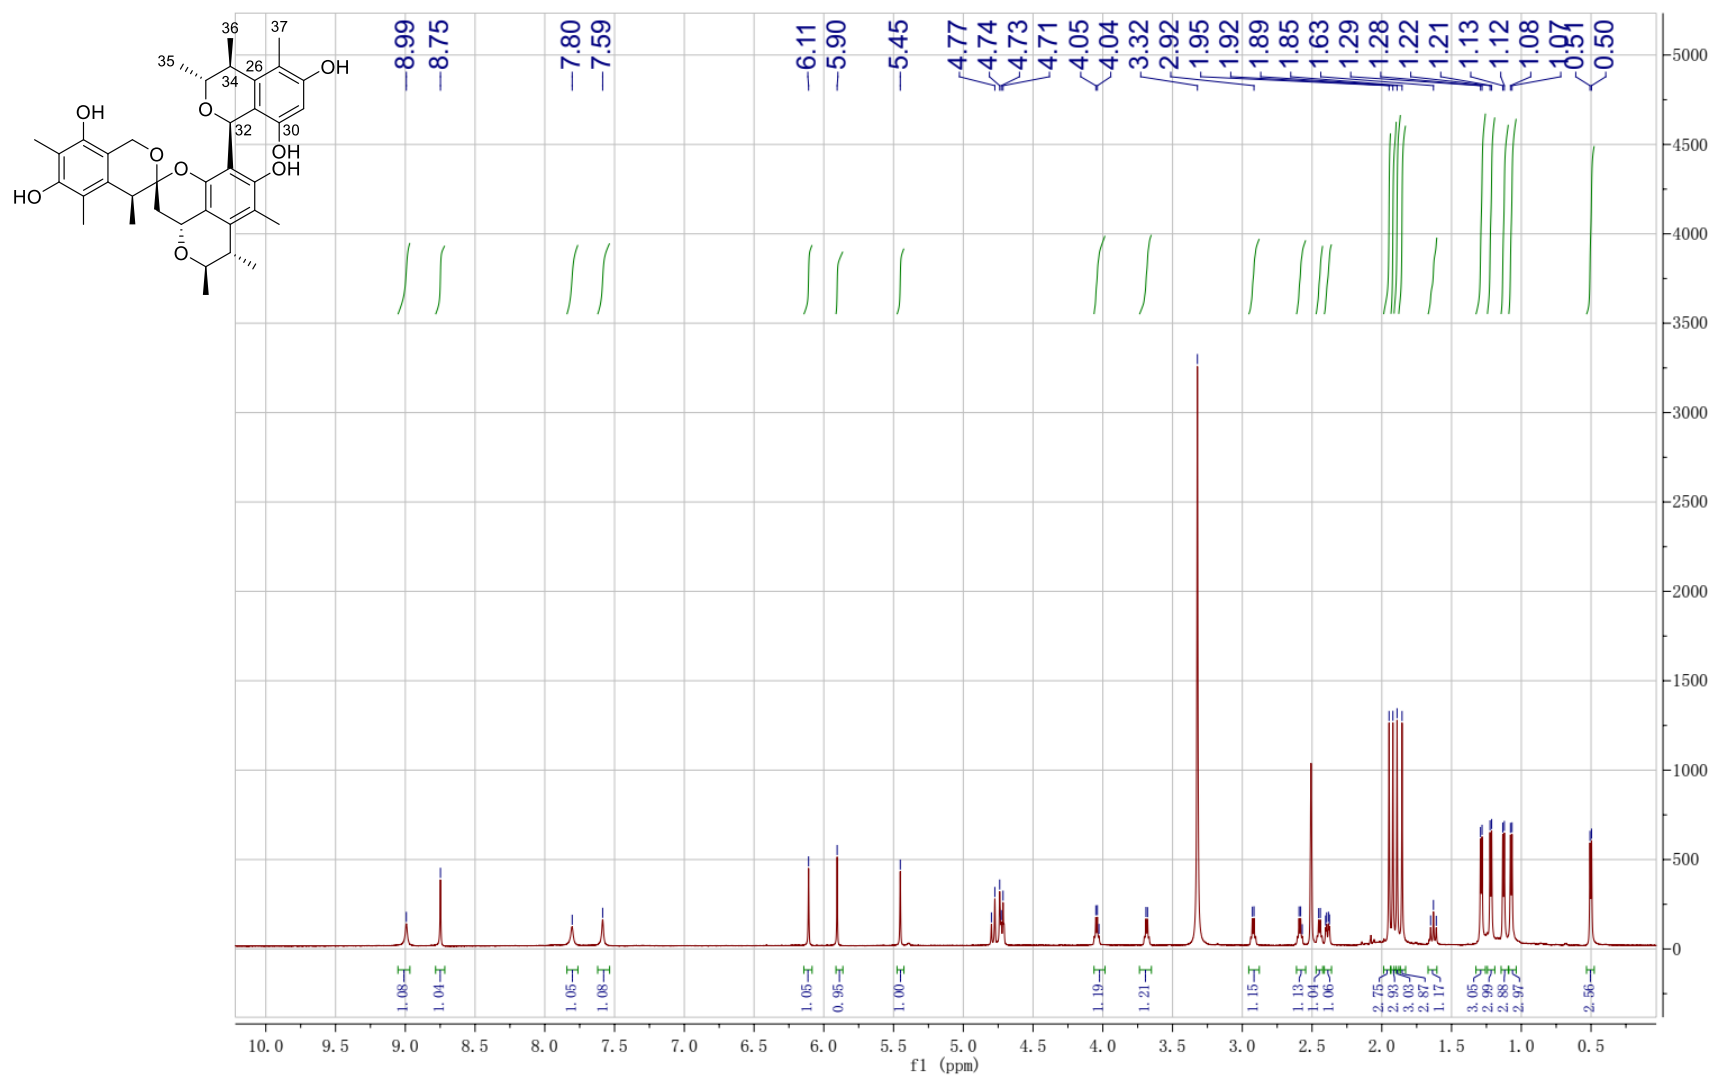

**Figure S8.**  $^{13}\text{C}$  NMR Spectrum of Spirocitrinol B (**2**; 150 MHz,  $\text{DMSO-}d_6$ )

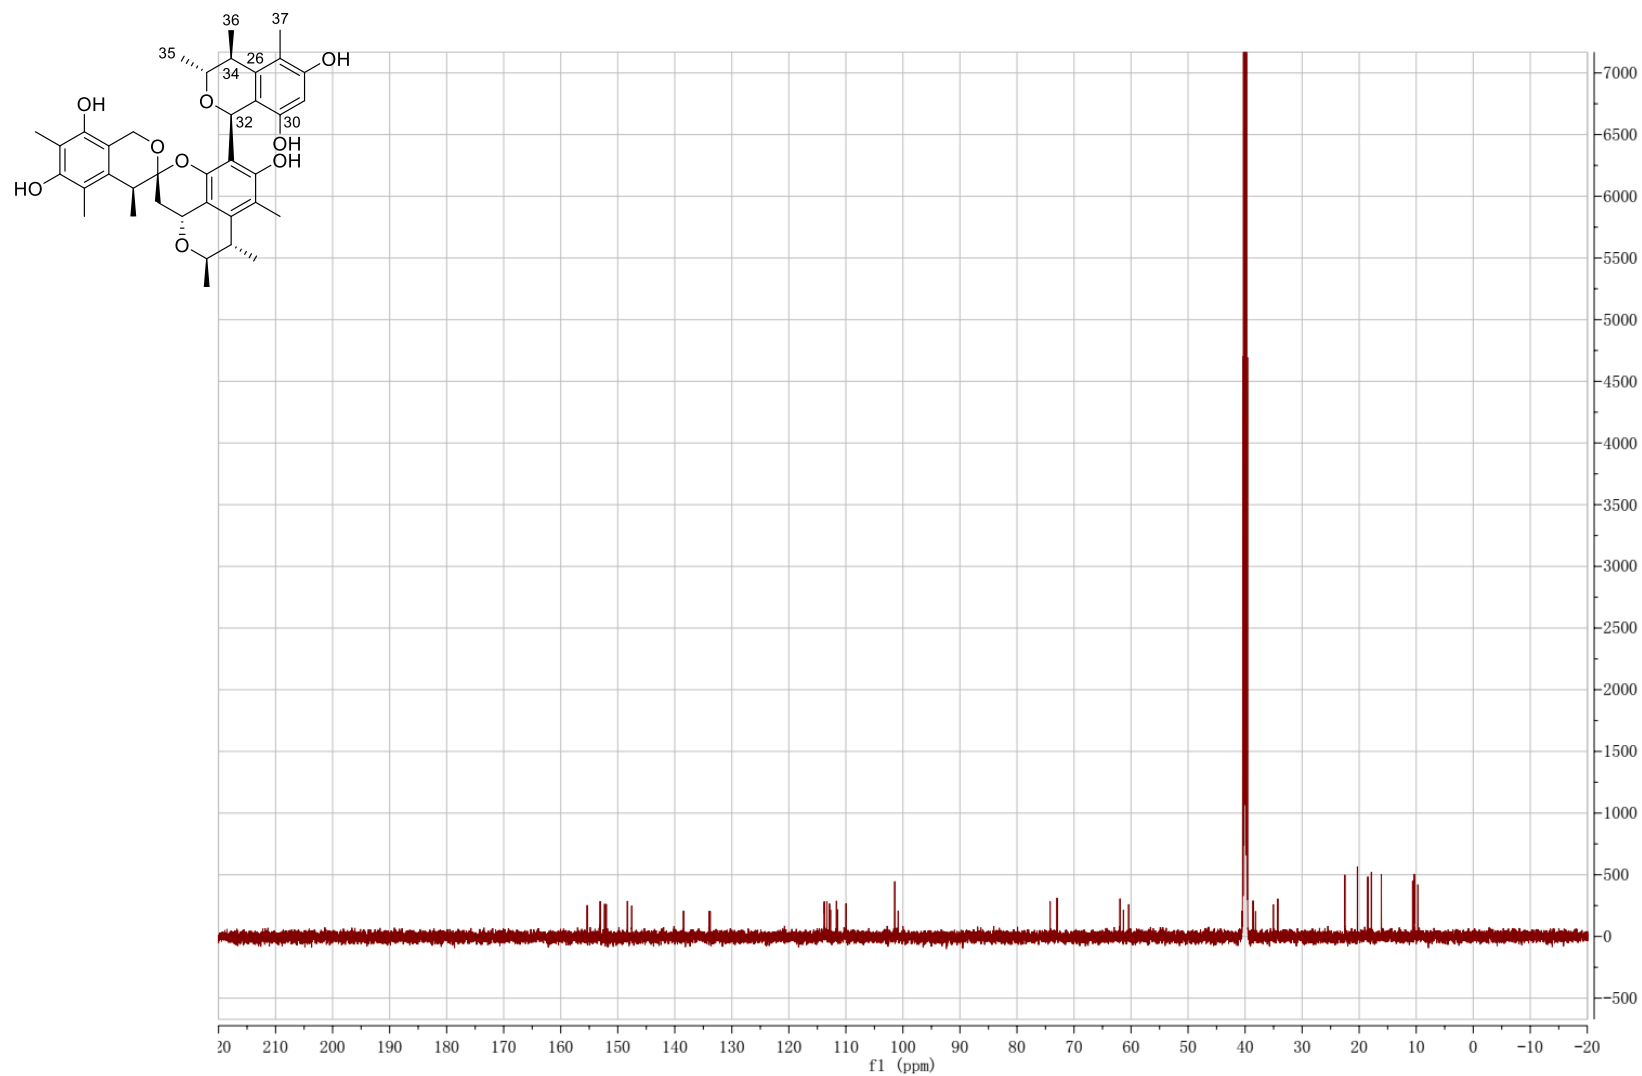

**Figure S9.** HSQC Spectrum of Spirocitrinol B (**2**; 600 MHz, DMSO-*d*<sub>6</sub>)

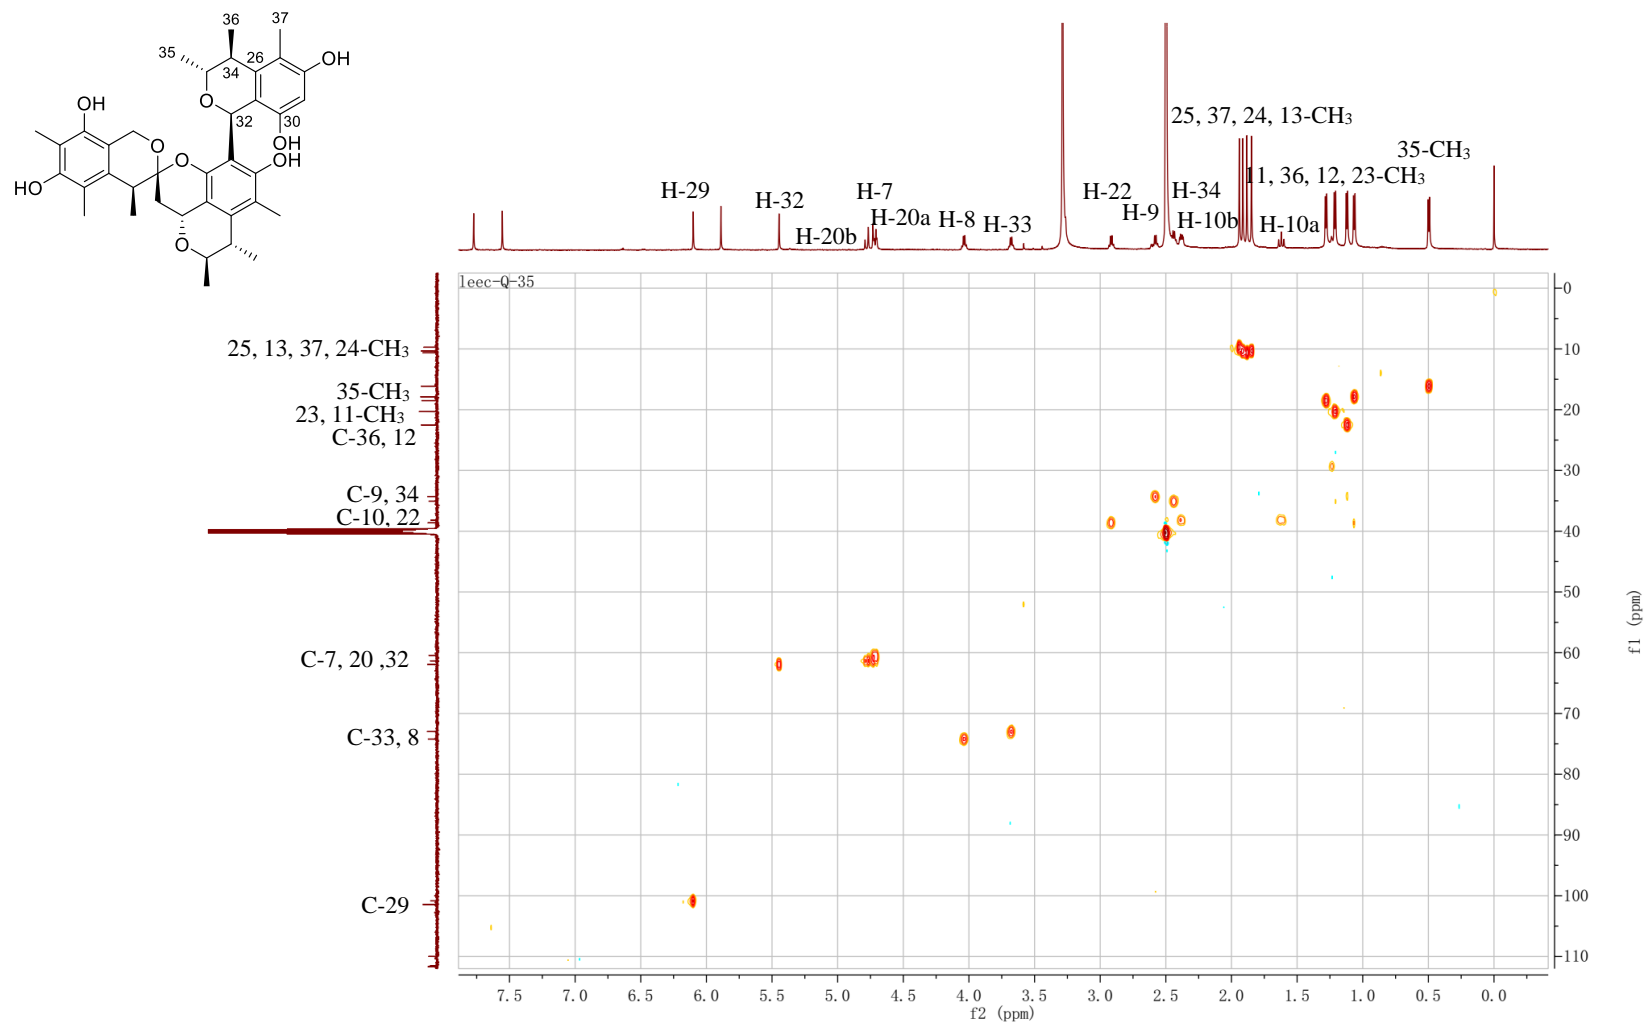

**Figure S10.** HMBC Spectrum of Spirocitrinol B (**2**; 600 MHz, DMSO-*d*<sub>6</sub>)

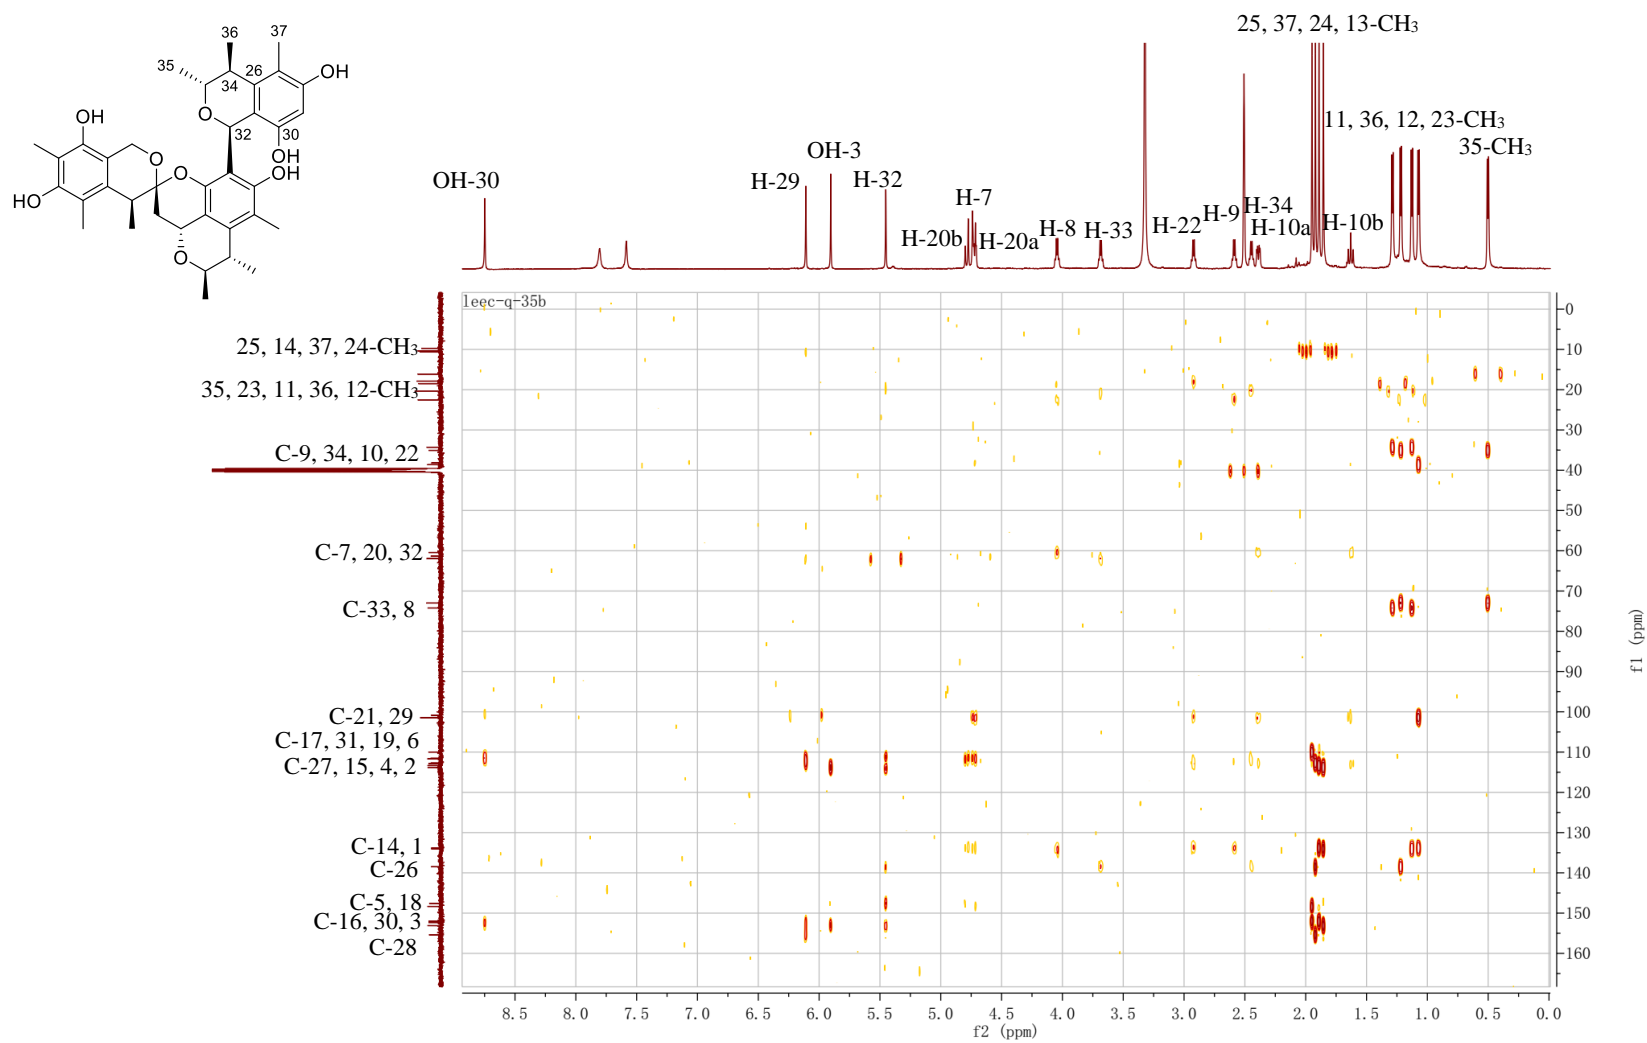

**Figure S11.** NOESY Spectrum of Spirocitrinol B (**2**; 600 MHz, DMSO-*d*<sub>6</sub>)

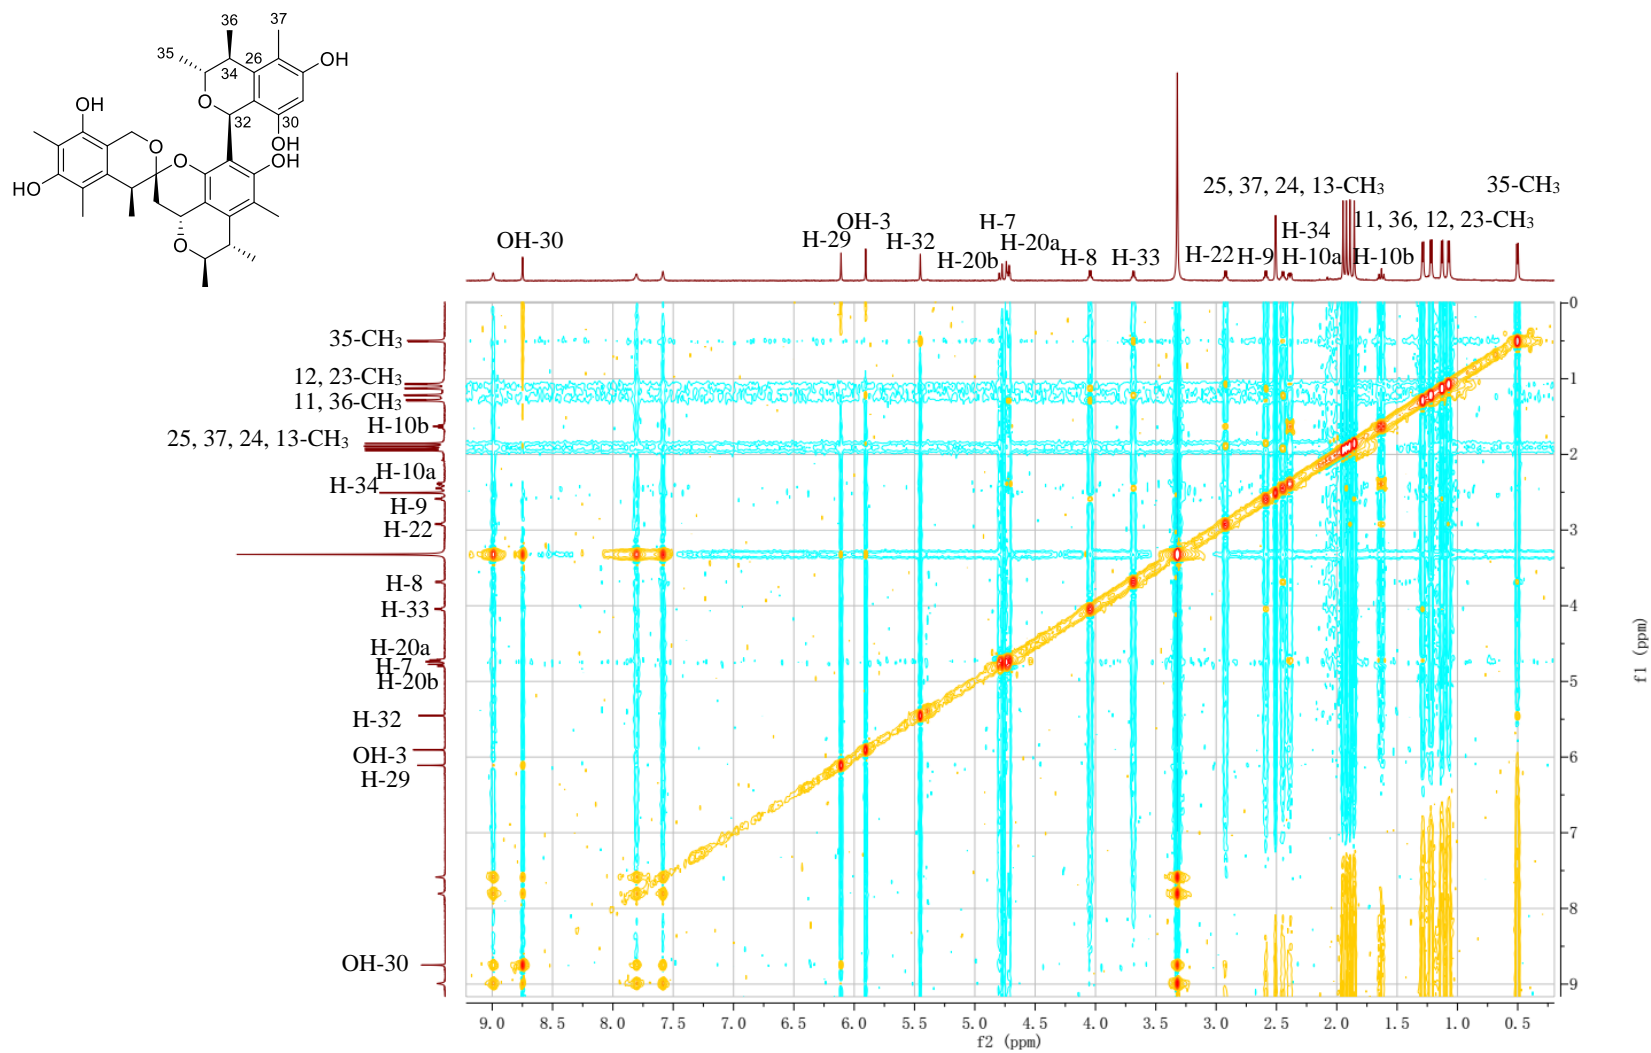

**Figure S12.** NOE Difference Spectrum of Spirocitrinol B (**2**; 600 MHz, DMSO-*d*<sub>6</sub>)

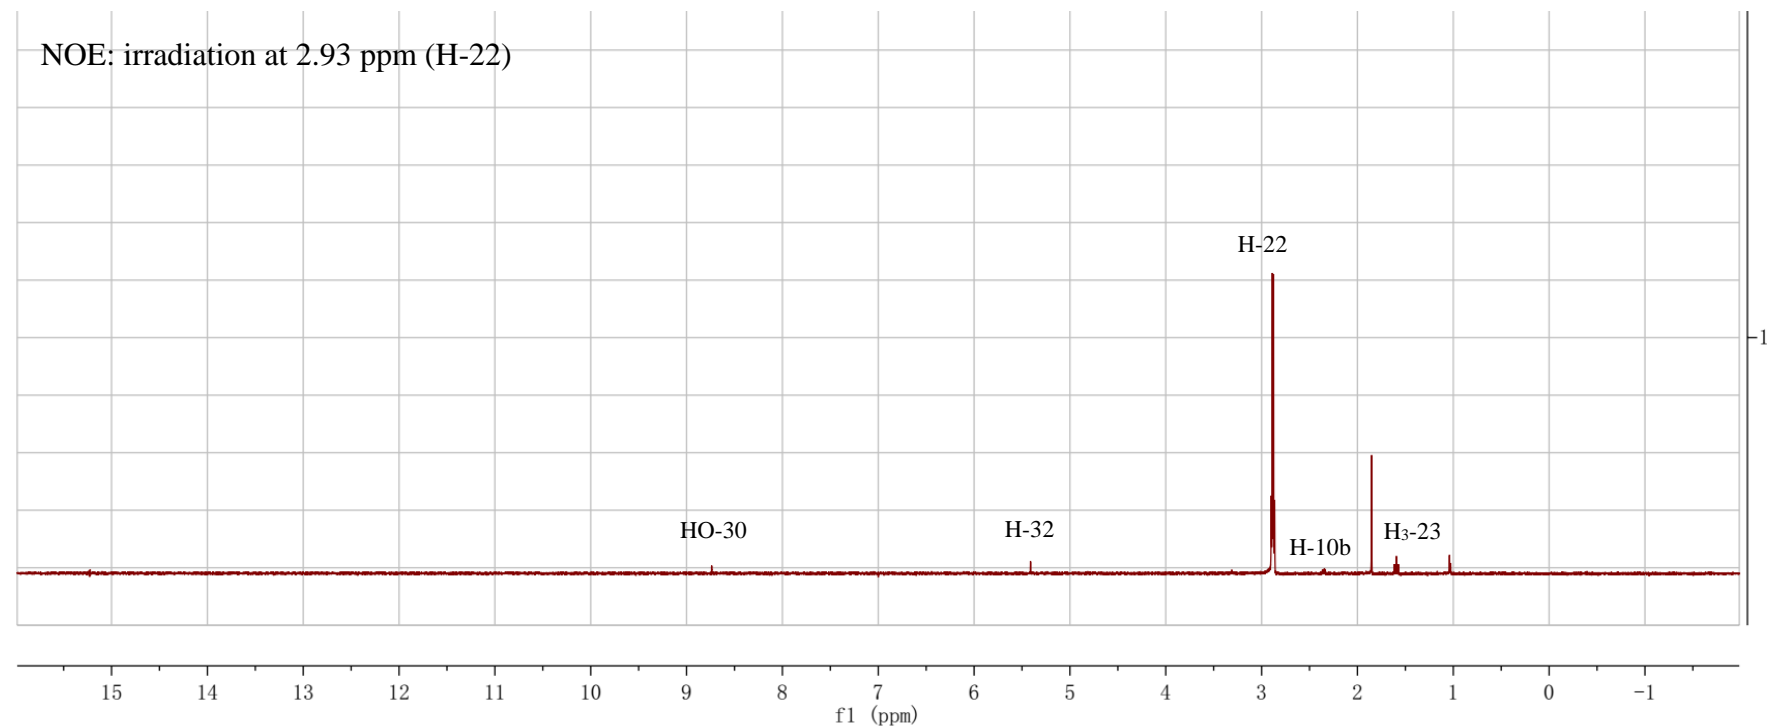

**Figure S13.** HRESIMS Spectrum of Spirocitrinol B (2)

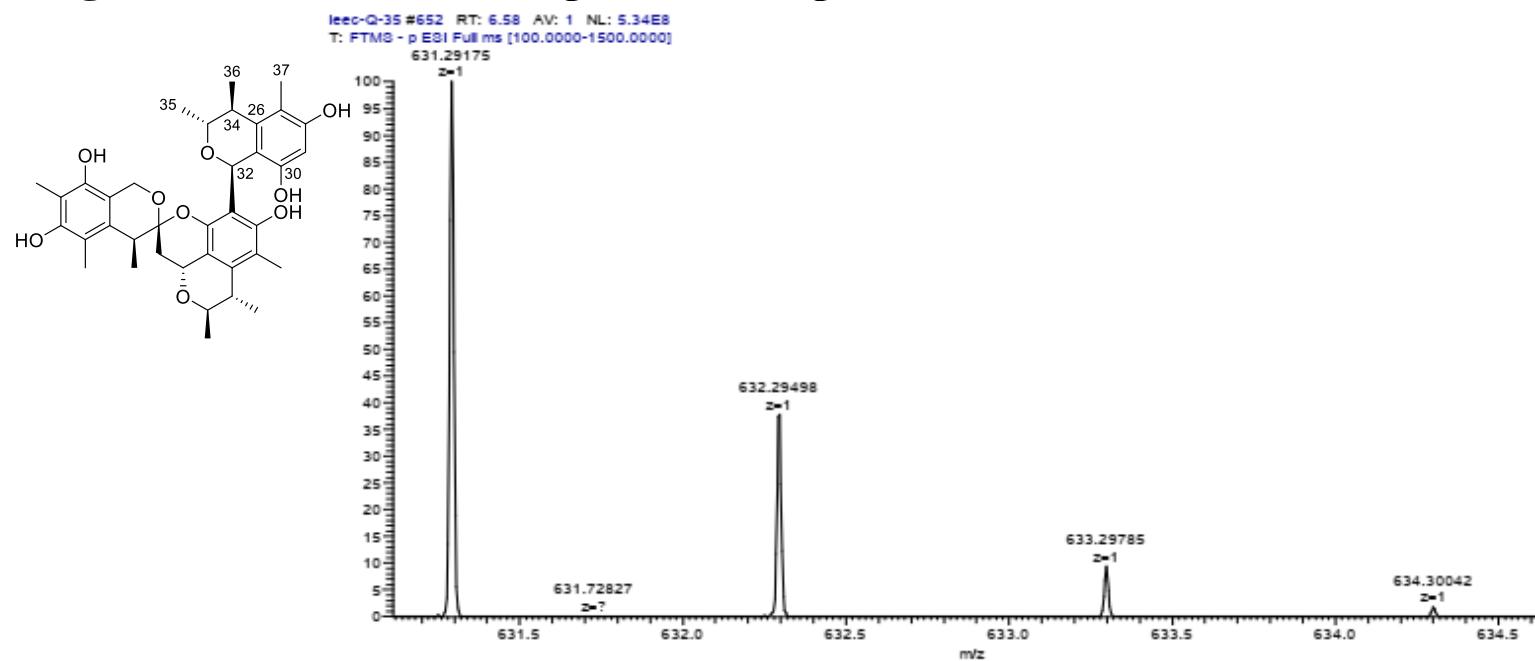

| m/z       | Theo. Mass | Delta (ppm) | RDB equiv. | Composition |     |
|-----------|------------|-------------|------------|-------------|-----|
| 631.29175 | 631.29126  | 0.78        | 16.5       | C37 H43 O9  | M-H |



**Figure S14.** The Optimized Conformers of **1a**

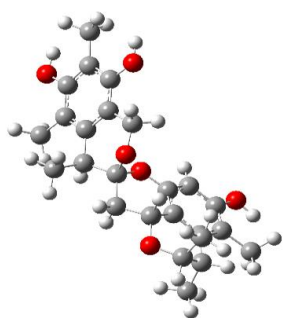

**1a C1** (1.72%)

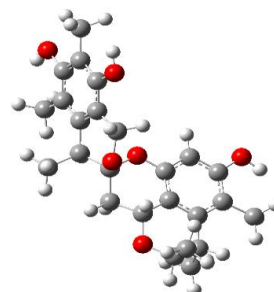

**1a C2** (19.82%)

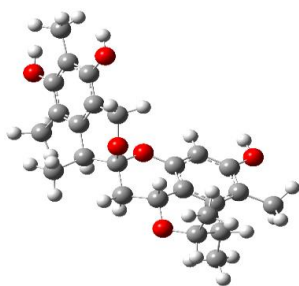

**1a C3** (5.84%)

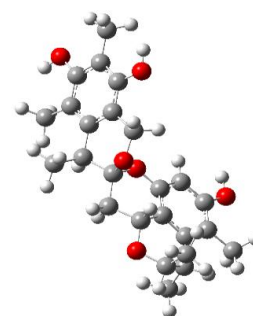

**1a C4** (72.62%)

**Figure S15.** The Optimized Conformers of **2a**

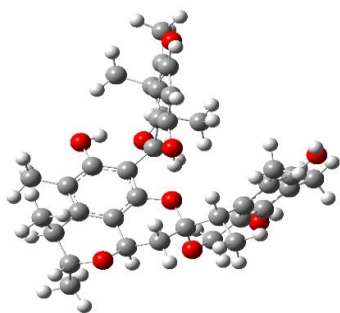

**2a C1** (74.29%)

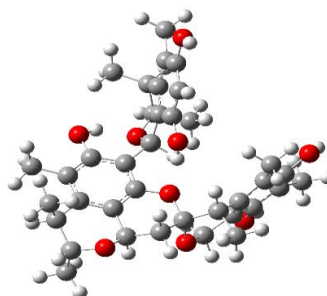

**2a C2** (9.47%)

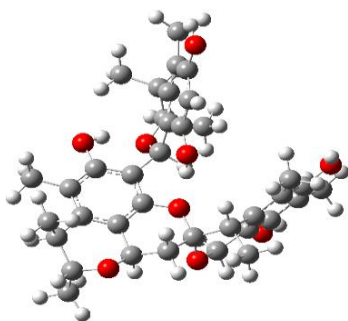

**2a C3** (14.92%)

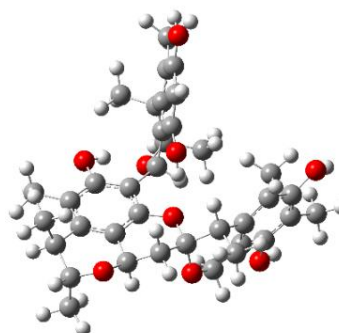

**2a C4** (1.31%)

**Figure S16.** The ITS rDNA Sequence Data of *Penicillium citrinum*

```

CCACCTCCCACCCGTGTTGCCCGAACCTATGTTGCCTCGGGCGGGCCCCGCGCCCG
CCGACGGCCCCCTGAACGCTGTCTGAAGTTGCAGTCTGAGACCTATAACGAAAT
TAGTTAAAACCTTTCAACAACGGATCTCTTGGTTCCGGCATCGATGAAGAACGCAG
CGAAATGCGATAACTAATGTGAATTGCAGAATTCAGTGAATCATCGAGTCTTTGA
ACGCACATTGCGCCCTCTGGTATTCCGGAGGGCATGCCTGTCCGAGCGTCATTGC
TGCCCTCAAGCCCGGCTTGTGTGTTGG
    
```

**Figure S17.** Cytotoxic Effects of Compounds 1 and 2 against Seven Tumor Cell Lines

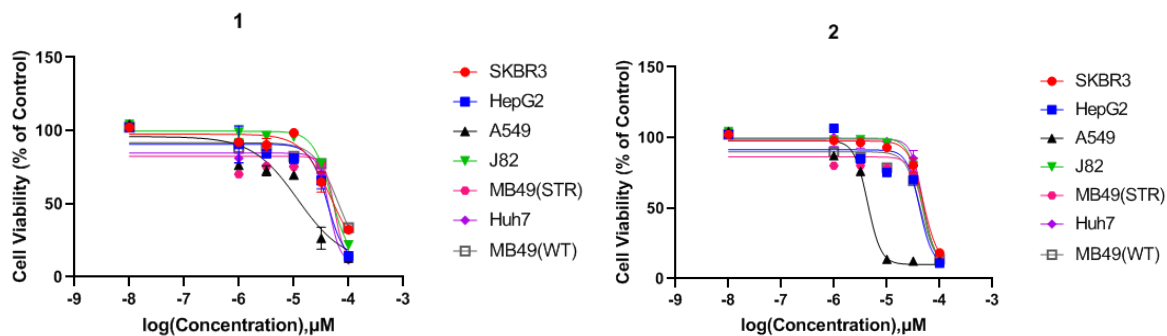

## Scheme S1. Plausible Biosynthetic Pathways for Compounds 1 and 2

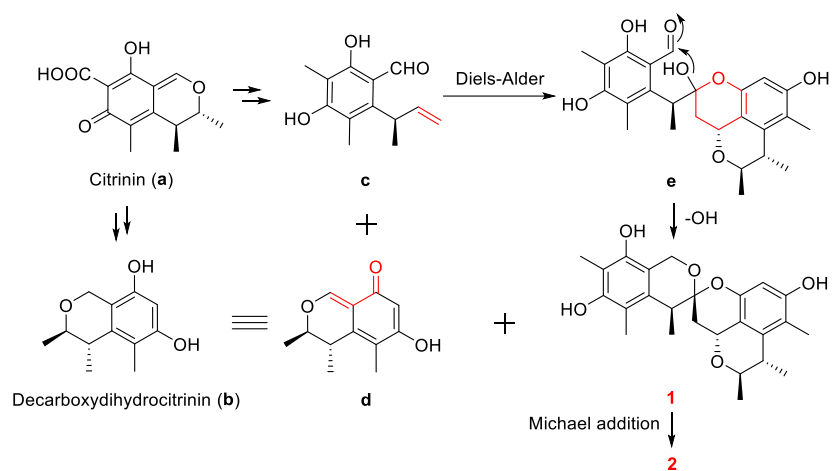

Supplement: d3ra00665d1.pdf [file d3ra00665d1.pdf]
